# Supplementary material for: Comparison of SARS-CoV-2- and HCoV-Specific T Cell Response Using IFN-γ ELISpot
Source: MDPI journal article supplement (doi:10.3390/diagnostics11081439), 2021-08-10
Supplement: s1 [file s1]

**Table S1: Distribution of positive T cell responses in IFN- $\gamma$  ELISpot.** The percentage of results considered positive according to the cut-off definition was calculated. (Cut-off definition: The negative controls had on average 0.50 spots (range 0-12) and its 3-fold standard deviation was  $3 \times 1.34 \text{ spots} = 4.02 \text{ spots}$  (which we considered as background of the negative controls). As we used increment values, a threefold higher value vs. background means  $3 \times 4.02 \text{ spots} \text{ minus } 1 \times 4.02 \text{ spots}$ , i.e., 8.04 spots increment.)

| Coronavirus       | Percentage of positive responses |
|-------------------|----------------------------------|
| S1/S2 peptide mix | 31.0%                            |
| S1 peptide mix    | 37.9%                            |
| S1 Sino protein   | 10.3%                            |
| HCoV-HKU1         | 6.9%                             |
| HCoV-OC43         | 68.9%                            |
| HCoV-NL63         | 3.5%                             |
| HCoV-229E         | 3.4%                             |

**Table S2: Spearman analysis of the total cohort.** In each case, spots increment upon stimulation with SARS-CoV-2 proteins/peptide mixtures was tested against spots increment upon stimulation with the S protein of HCoVs.

| SARS-CoV-2 vs. HCoV | Correlation coefficient r | p-value |
|---------------------|---------------------------|---------|
| S1/S2 vs. HKU1      | -0.2656                   | 0.1638  |
| S1 vs. HKU1         | -0.1935                   | 0.3145  |
| S1 Sino vs. HKU1    | -0.0740                   | 0.7028  |
| S1/S2 vs. OC43      | -0.1802                   | 0.3496  |
| S1 vs. OC43         | 0.0319                    | 0.8695  |
| S1 Sino vs. OC43    | 0.1410                    | 0.4658  |
| S1/S2 vs. NL63      | -0.3686                   | 0.0491  |
| S1 vs. NL63         | -0.2345                   | 0.2208  |
| S1 Sino vs. NL63    | 0.0812                    | 0.6754  |
| S1/S2 vs. 229E      | 0.0234                    | 0.9040  |
| S1 vs. 229E         | -0.0811                   | 0.6760  |
| S1 Sino vs. 229E    | 0.1200                    | 0.5351  |

**Table S3: Spearman analysis of the convalescent volunteers.** In each case, spots increment upon stimulation with SARS-CoV-2 proteins/peptide mixtures was tested against spots increment upon stimulation with the S protein of HCoVs.

| SARS-CoV-2 vs. HCoV | Correlation coefficient r | p-value |
|---------------------|---------------------------|---------|
| S1/S2 vs. HKU1      | -0.2591                   | 0.2840  |
| S1 vs. HKU1         | -0.2756                   | 0.2534  |
| S1 Sino vs. HKU1    | -0.3076                   | 0.2001  |
| S1/S2 vs. OC43      | -0.1224                   | 0.6177  |

|                  |         |        |
|------------------|---------|--------|
| S1 vs. OC43      | 0.1204  | 0.6234 |
| S1 Sino vs. OC43 | 0.1684  | 0.4908 |
| S1/S2 vs. NL63   | -0.2928 | 0.2239 |
| S1 vs. NL63      | -0.3182 | 0.1842 |
| S1 Sino vs. NL63 | -0.0196 | 0.9367 |
| S1/S2 vs. 229E   | -0.1838 | 0.4513 |
| S1 vs. 229E      | -0.2674 | 0.2683 |
| S1 Sino vs. 229E | -0.1379 | 0.5734 |

**Table S4: Spearman analysis of the vaccinated volunteers.** In each case, spots increment upon stimulation with SARS-CoV-2 proteins/peptide mixtures was tested against spots increment upon stimulation with the S protein of HCoV.s.

| <b>SARS-CoV-2 vs. HCoV</b> | <b>Correlation coefficient r</b> | <b>p-value</b> |
|----------------------------|----------------------------------|----------------|
| S1/S2 vs. HKU1             | -0.3313                          | 0.3484         |
| S1 vs. HKU1                | -0.0187                          | 0.9616         |
| S1 Sino vs. HKU1           | 0.3963                           | 0.2603         |
| S1/S2 vs. OC43             | -0.0609                          | 0.8706         |
| S1 vs. OC43                | 0.3040                           | 0.9382         |
| S1 Sino vs. OC43           | 0.0184                           | 0.9730         |
| S1/S2 vs. NL63             | -0.4242                          | 0.2204         |
| S1 vs. NL63                | -0.2130                          | 0.5484         |
| S1 Sino vs. NL63           | 0.0935                           | 0.8008         |
| S1/S2 vs. 229E             | 0.0741                           | 0.8427         |
| S1 vs. 229E                | 0.1662                           | 0.6456         |
| S1 Sino vs. 229E           | 0.5031                           | 0.1434         |
